# Supplementary material for: Canonical NF-κB Promotes Lung Epithelial Cell Tumour Growth by Downregulating the Metastasis Suppressor CD82 and Enhancing Epithelial-to-Mesenchymal Cell Transition
Source: MDPI journal article supplement (doi:10.3390/cancers13174302), 2021-08-26
Supplement: s1 [file s1]

Article

# Canonical NF- $\kappa$ B Promotes Lung Epithelial Cell Tumour Growth by Downregulating the Metastasis Suppressor CD82 and Enhancing Epithelial-to-Mesenchymal Cell Transition

Eugenia Roupakia <sup>1,2</sup>, Evangelia Chavdoula <sup>2,3,†</sup>, Georgia Karpathiou <sup>4,‡</sup>, Giannis Vatsellas <sup>3</sup>, Dimitrios Chatzopoulos <sup>3</sup>, Angeliki Mela <sup>5</sup>, Jennifer M. Gillette <sup>6</sup>, Katarina Kriegsmann <sup>7</sup>, Mark Kriegsmann <sup>8</sup>, Anna Batistatou <sup>4</sup>, Anna Goussia <sup>4</sup>, Kenneth B. Marcu <sup>3,9</sup>, Emmanouil Karteris <sup>10</sup>, Apostolos Klinakis <sup>3</sup> and Evangelos Kolettas <sup>1,2,\*</sup>

## Supplementary Materials

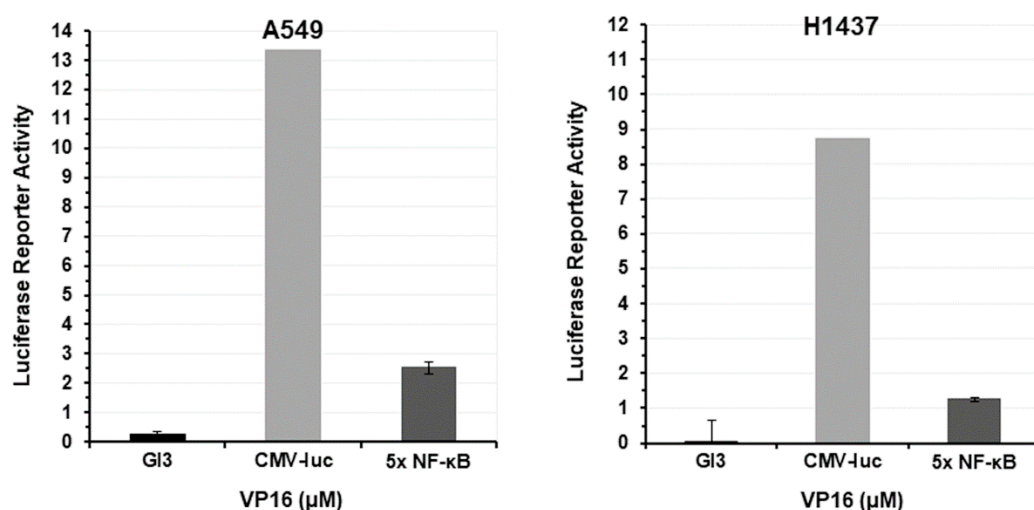

Figure S1. NF- $\kappa$ B luciferase reporter assays of A549 and H1437 cells.

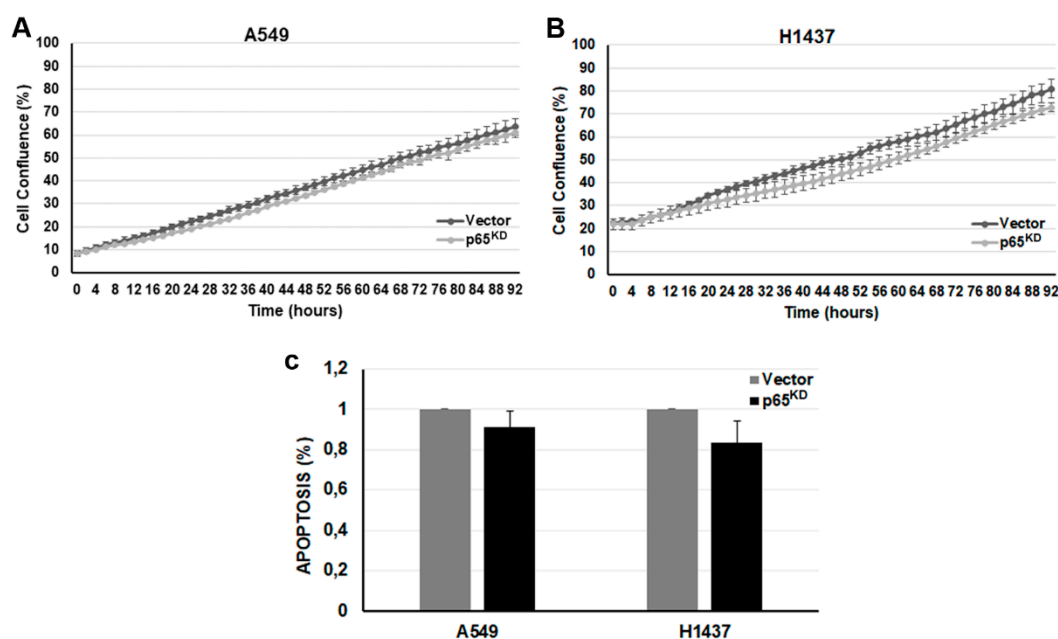

Figure S2. Growth of vector control and p65KD A549 and H1437 cells.

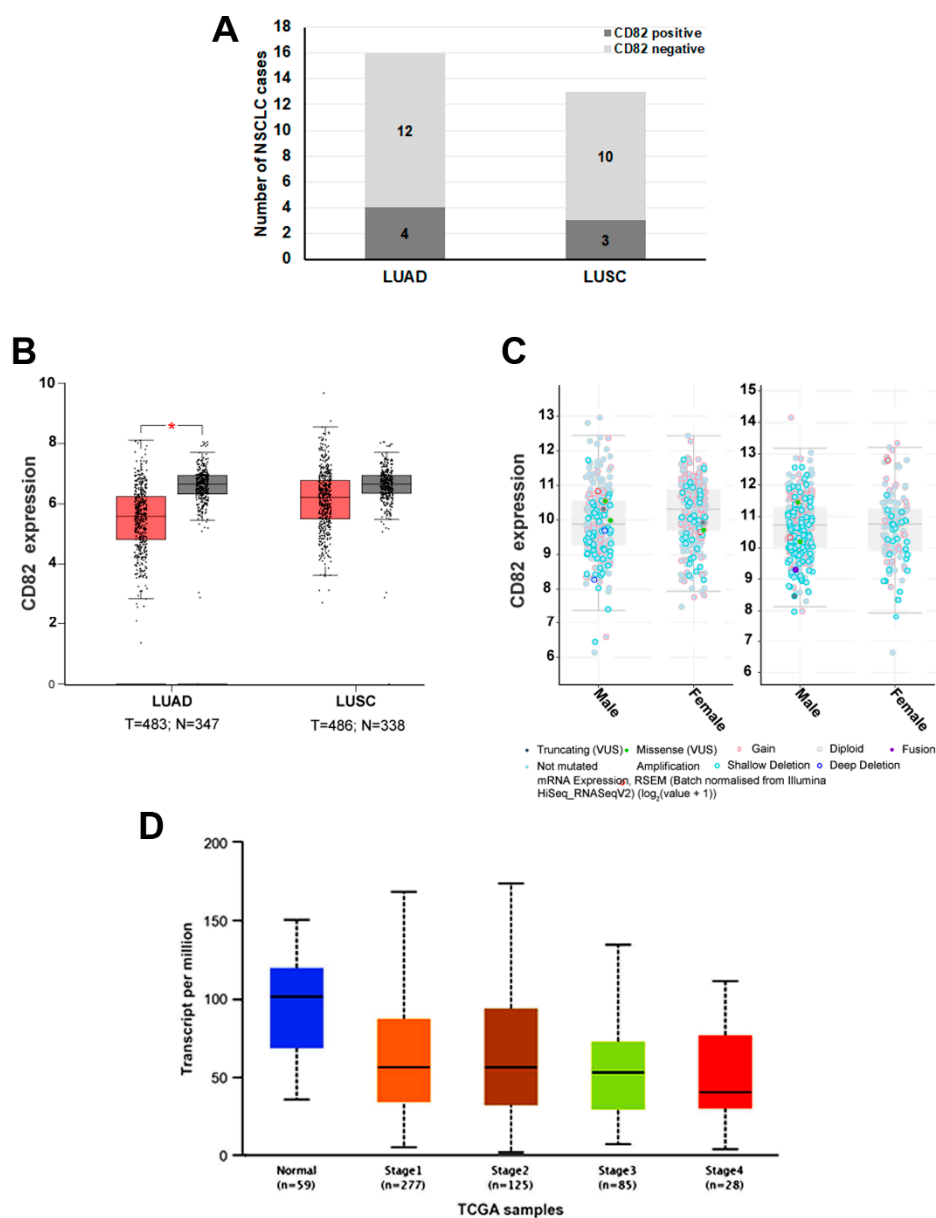

**Figure S3.** Expression of CD82 in LUAD and LUSC.

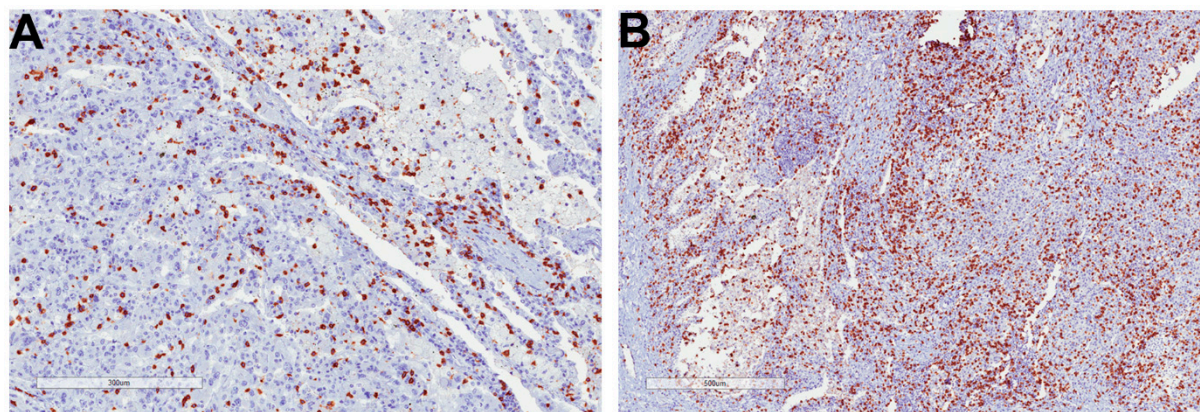

**Figure S4.** Analysis of the immunohistochemical expression of CD8 in whole sections of early and advanced human LUAD and LUSC.

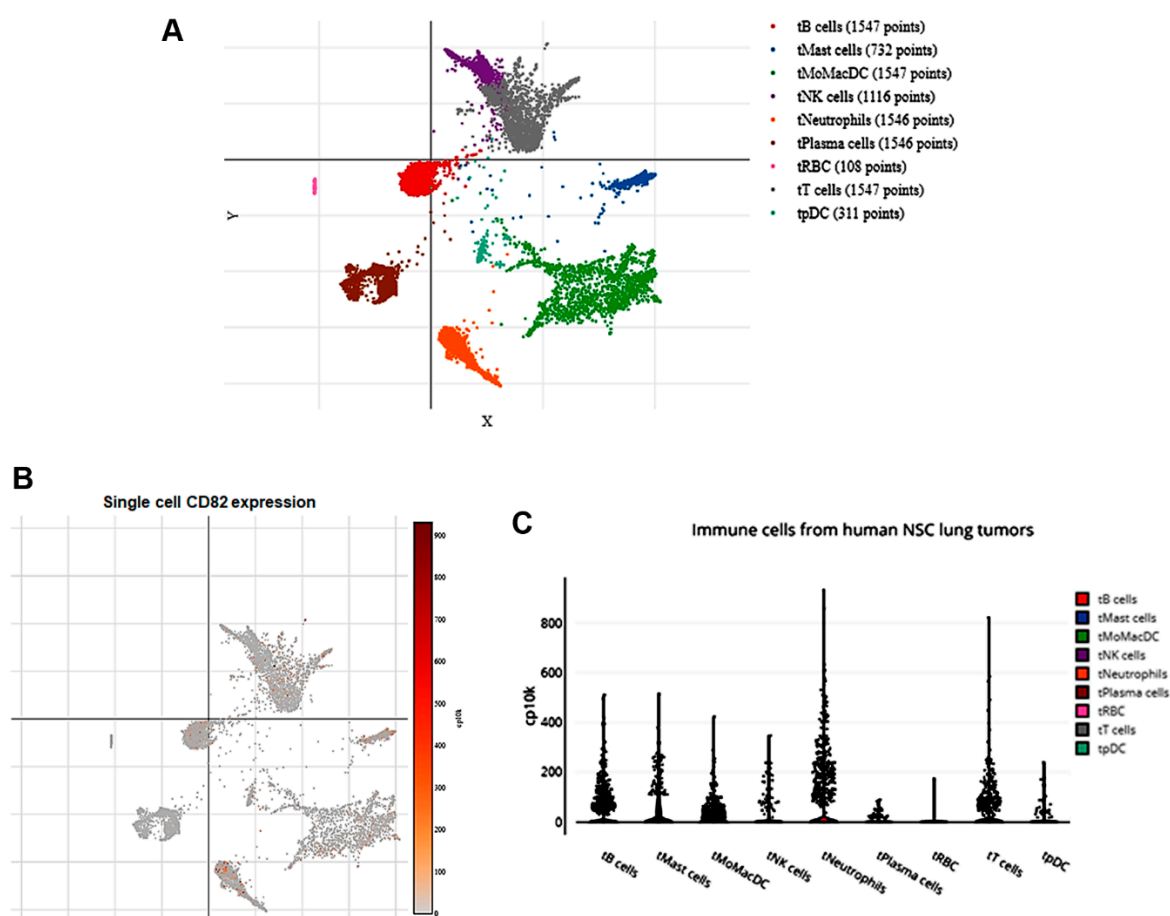

Figure S5. Single cell analysis of human immune cells in lung cancer.

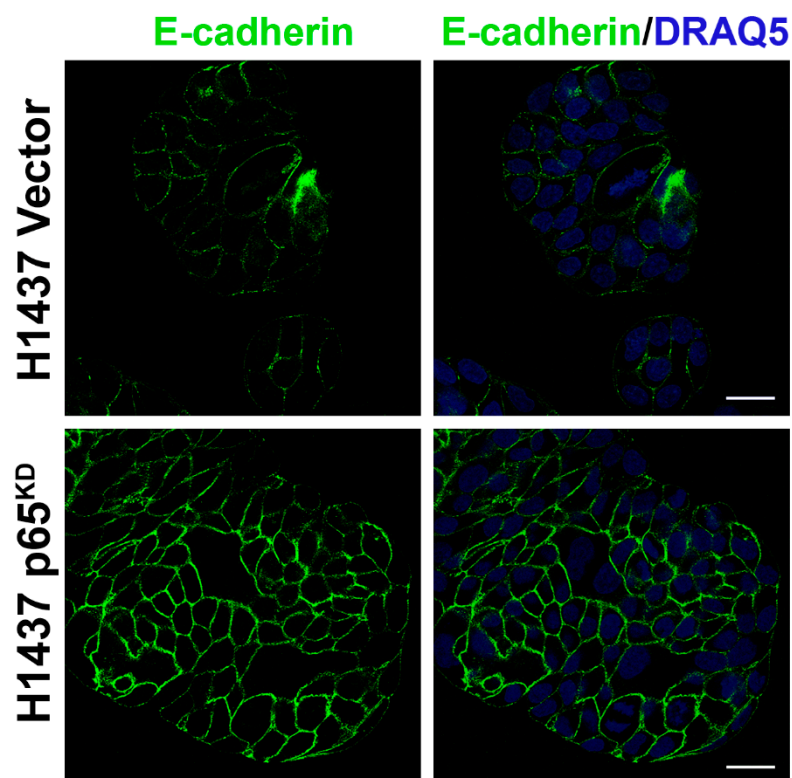

Figure S6. Expression and localisation of E-cadherin protein in vector control and RelA/p65KD H1437 human NSCLC cell line.

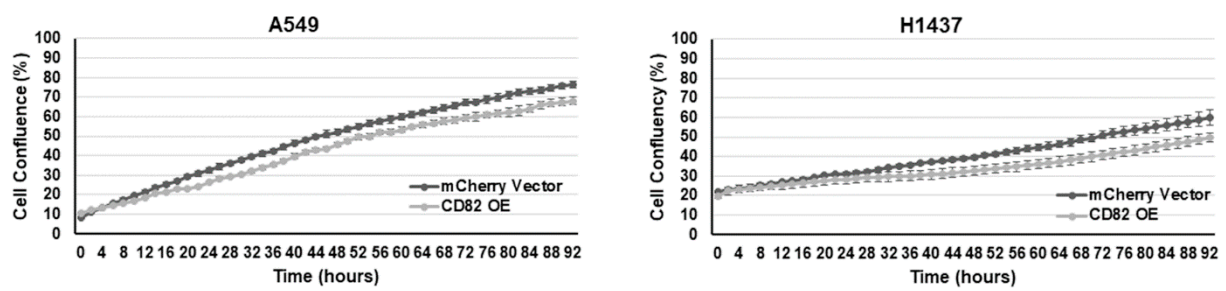

**Figure S7.** Growth curves of vector control mCherry and mCherry-CD82OE A549 and H1437 lung cancer cells.

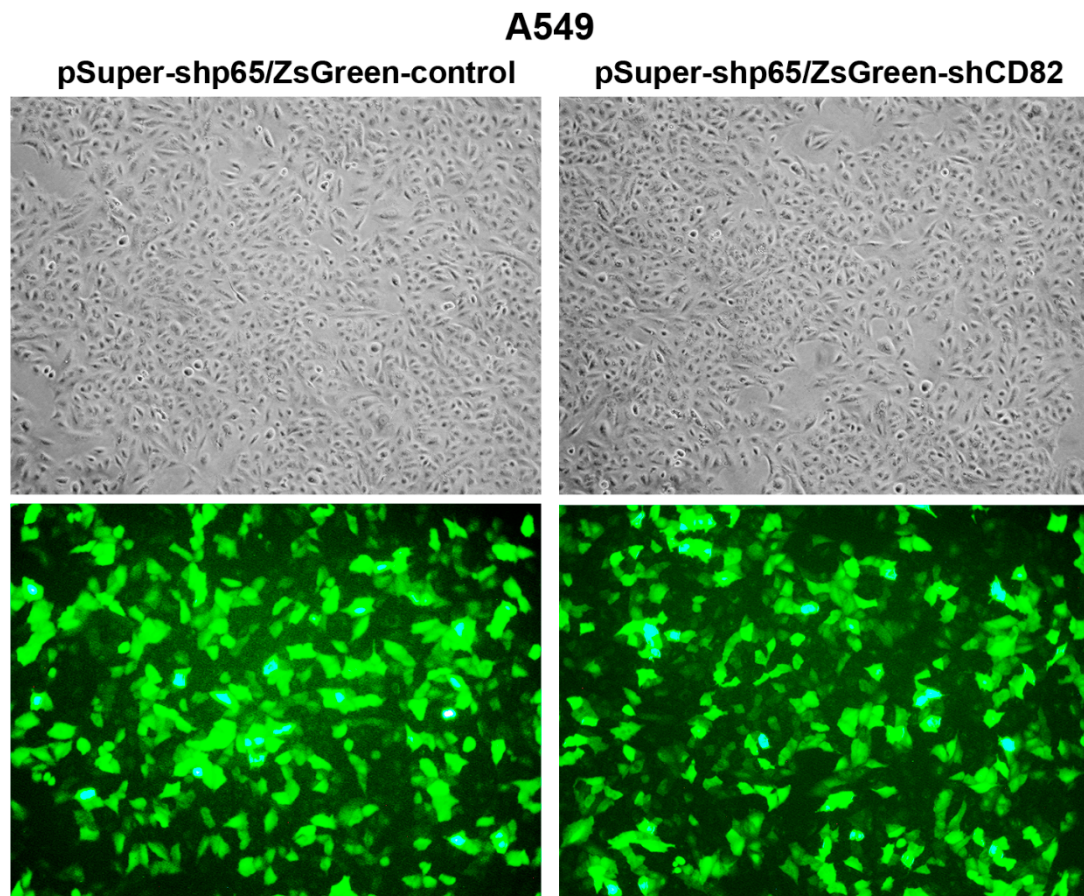

**Figure S8.** Generation of CD82KD human NSCLC cells.

**Table S1.** Clinicopathological variables and statistical analysis of the immunohistochemical staining of CD8, a marker of TILs, in FFPE whole tissue sections from NSCLC patients. Lung adenocarcinoma (LUAD) and squamous cell carcinoma (LUSC).

| Clinico-pathological. variables |                                 |     |                 | Number of cases                |     |                 |
|---------------------------------|---------------------------------|-----|-----------------|--------------------------------|-----|-----------------|
| <b>Histological type</b>        |                                 |     |                 |                                |     |                 |
| LUAD                            |                                 |     |                 | 16                             |     |                 |
| LUSC                            |                                 |     |                 | 13                             |     |                 |
| <b>Stage</b>                    |                                 |     |                 |                                |     |                 |
| Early                           |                                 |     |                 | 10                             |     |                 |
| Advanced                        |                                 |     |                 | 19                             |     |                 |
| <b>Age</b>                      |                                 |     |                 |                                |     |                 |
| <60                             |                                 |     |                 | 1                              |     |                 |
| ≥60                             |                                 |     |                 | 28                             |     |                 |
| <b>Sex</b>                      |                                 |     |                 |                                |     |                 |
| Male                            |                                 |     |                 | 25                             |     |                 |
| Female                          |                                 |     |                 | 4                              |     |                 |
| Expression                      | CD8 <sup>+</sup> intra-tumoural |     |                 | CD8 <sup>+</sup> peri-tumoural |     |                 |
| CD82                            | 0–1                             | 2–3 | <i>p</i> -value | 0–1                            | 2–3 | <i>p</i> -value |
| Positive                        | 5                               | 2   | 0.1             | 3                              | 4   | 0.5             |
| Negative                        | 7                               | 13  |                 | 6                              | 14  |                 |

Fisher's exact test. Expression levels: 0 = No expression; 1 = Mild; 2 = Moderate; 4 = Intense



**Table S2.** Bioinformatics analysis revealed a link between NF- $\kappa$ B RelA/p65, and integrin signalling pathways. Bioinformatics analysis using the Nature pathways showed that both cell lines, A549 and H1437, share commonly affected pathways such as integrin signalling pathways.

| <b>A549</b>                                                                      |                |
|----------------------------------------------------------------------------------|----------------|
| <b>Pathway (NCI-Nature 2016)</b>                                                 | <b>p-value</b> |
| $\beta$ 3 integrin cell surface interactions                                     | 0.000002       |
| $\beta$ 2 integrin cell surface interactions                                     | 0.000135       |
| $\beta$ 1 integrin cell surface interactions                                     | 0.000345       |
| Urokinase-type plasminogen activator (uPA) and uPAR-mediated signalling          | 0.000579       |
| Alternative NF- $\kappa$ B pathway                                               | 0.001219       |
| Ephrin B reverse signalling                                                      | 0.002551       |
| Osteopontin-mediated events                                                      | 0.002805       |
| IL23-mediated signalling events                                                  | 0.004659       |
| Atypical NF- $\kappa$ B pathway                                                  | 0.010346       |
| Canonical NF- $\kappa$ B pathway                                                 | 0.018570       |
| <b>H1437</b>                                                                     |                |
| <b>Pathway (NCI-Nature 2016)</b>                                                 | <b>p-value</b> |
| Validated transcriptional targets of AP1 family members Fra1 and Fra2            | 0.0007         |
| $\alpha$ 9 $\beta$ 1 integrin signalling events                                  | 0.0043         |
| $\beta$ 1 integrin cell surface interactions                                     | 0.0087         |
| Signalling mediated by p38 $\gamma$ and p38 $\delta$                             | 0.0110         |
| Integrins in angiogenesis                                                        | 0.0143         |
| Syndecan-1-mediated signalling events                                            | 0.0156         |
| EphrinB-EPHB pathway                                                             | 0.0263         |
| Integrin family cell surface interactions                                        | 0.0266         |
| $\beta$ 5, $\beta$ 6, $\beta$ 7 and $\beta$ 8 integrin cell surface interactions | 0.0374         |
| SHP2 signalling                                                                  | 0.0402         |
